# Supplementary material
Source: ML conference proceedings conference paper supplement (https://proceedings.neurips.cc/paper_files/paper/2023/hash/3df38ca67befaed9c03b95ffee07d9f8-Abstract.html)
Supplement: Supplementary file 1 [file 3df38ca67befaed9c03b95ffee07d9f8-Supplemental-Conference.zip]

Archive with 2 entries (2 files):
- TAD_final.zip
- appendix_final.pdf
